# Supplementary material for: A facile template-assisted electrodeposition approach to porous Cu/Cu2O nanowires
Source: Royal Society of Chemistry journal article supplement (doi:10.1039/d1ra04770a), 2021-01-01
Supplement: d1ra04770a1.pdf [file d1ra04770a1.pdf]

## Supporting Information

### A facile template-assisted electrodeposition approach to porous Cu/Cu<sub>2</sub>O nanowires

Jin Zhang<sup>1,2‡</sup>, Jia Hao Ma<sup>2,‡</sup>, Jingyuan Bai<sup>3,\*</sup>, Dalong Yang<sup>1</sup>, Meilin Zhang<sup>3</sup>, Zhou

Yang<sup>1</sup>, Longyi Fan<sup>1</sup>, Xiao Lin Chen<sup>1,2</sup>, Ren Guo Guan<sup>1,\*</sup>

<sup>1</sup>Engineering Research Center of Continuous Extrusion, Ministry of Education, Dalian Jiaotong University, Dalian 116028, P. R. China

<sup>2</sup>State Key laboratory of Solidification Processing, Center of Advanced Lubrication and Seal Materials, Northwestern Polytechnical University, Xi'an, Shaanxi, 710072, P. R. China

<sup>3</sup>School of Materials Science and Engineering, Northeastern University, Shenyang 110819, China;

‡ both authors contributed equally to the work.

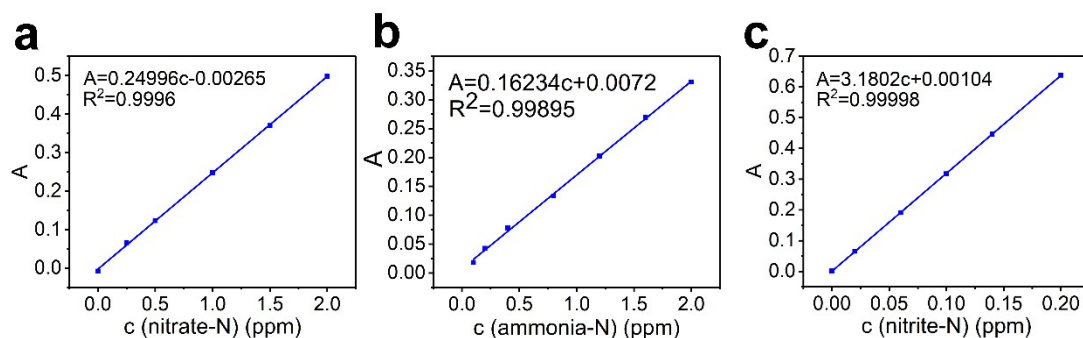

**Figure S1.** The UV-Vis absorption spectra and the corresponding calibration curves of a) nitrate-N, b) ammonia-N, c) nitrite-N for NO<sub>3</sub><sup>-</sup> electroreduction measurements by using ultrapure water as background solution.

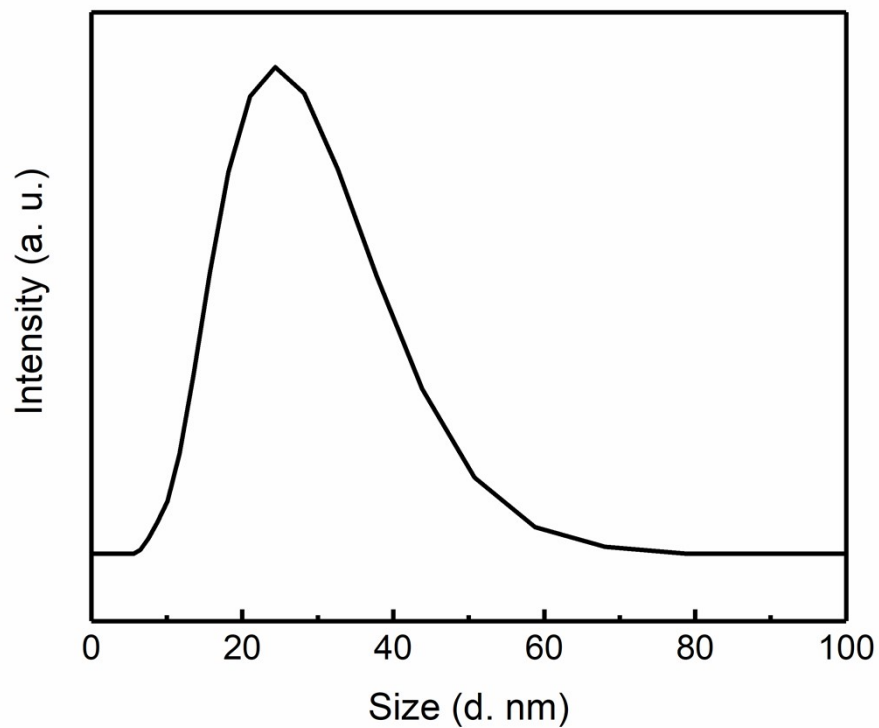

**Figure S2.** The size distribution of micelles in electrolyte containing 37g/L P-123 measured by dynamic light scattering (DLS).

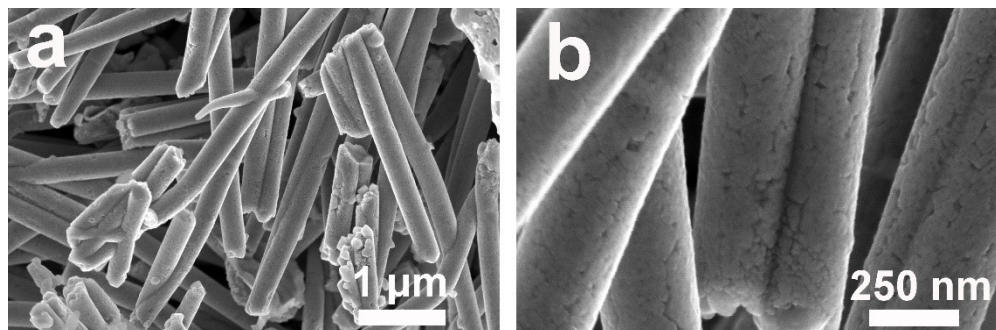

**Figure S3.** a) SEM and b) zoomed SEM images of as-obtained nanowires. The concentration of P-123 used is 8g/L.

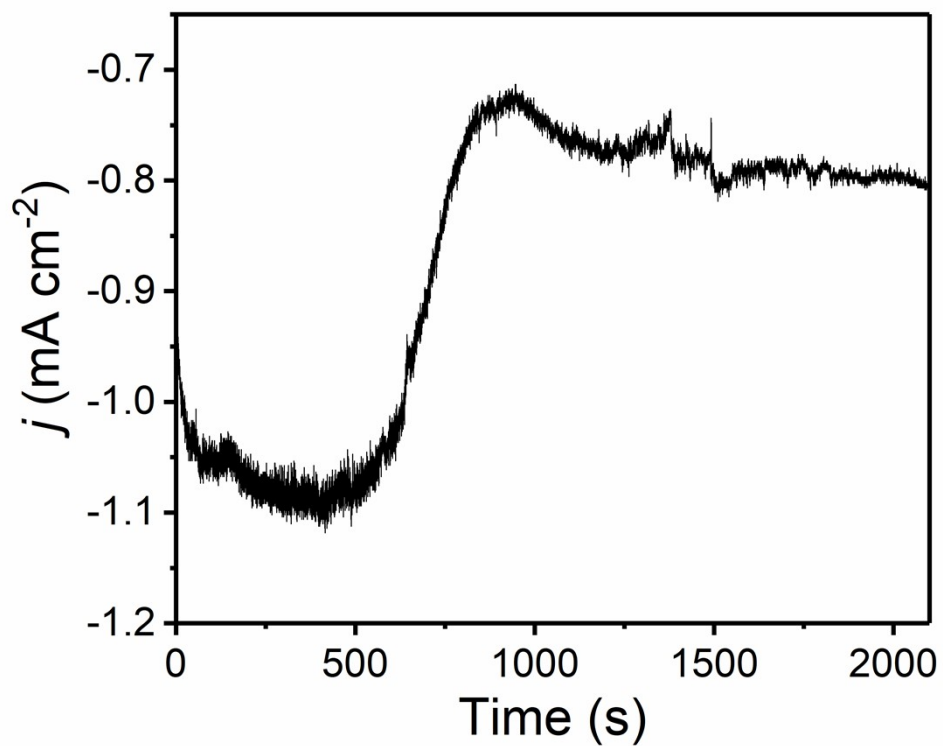

**Figure S4.** Current density changes during Cu/Cu<sub>2</sub>O PNs eletrodeposition process.

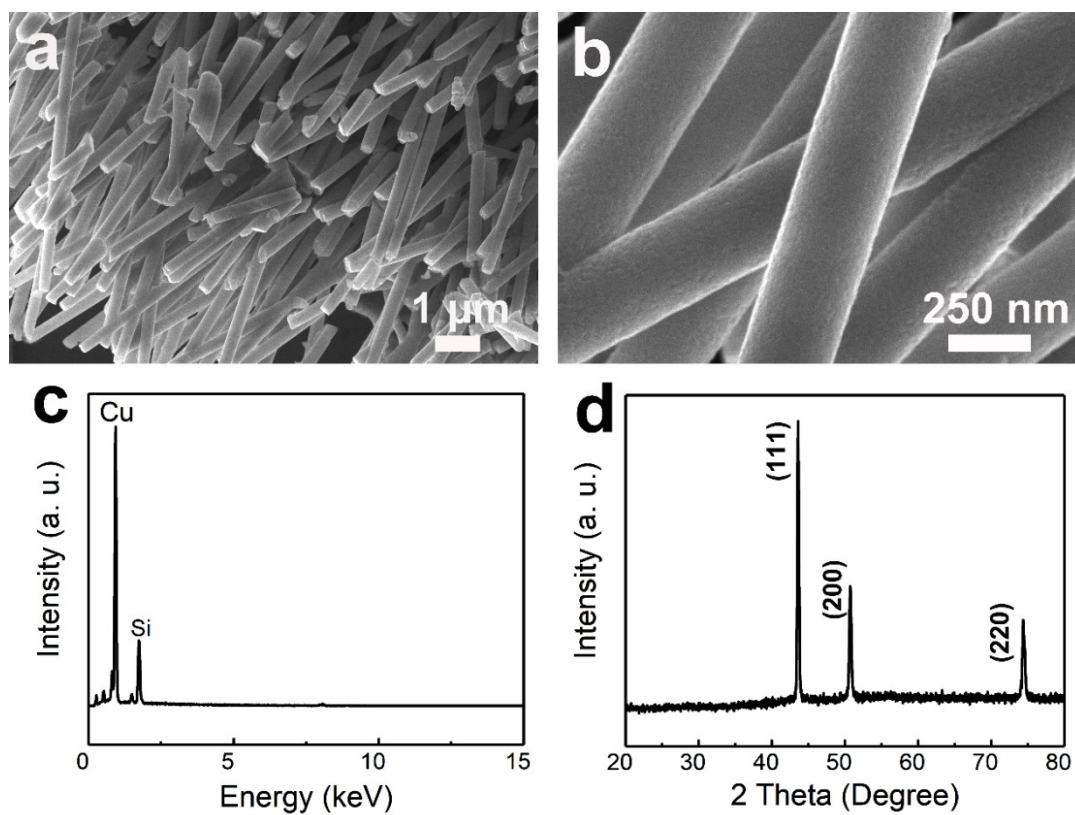

**Figure S5.** a) SEM, b) zoomed SEM, c) EDX d) XRD images of the Cu nanowires.

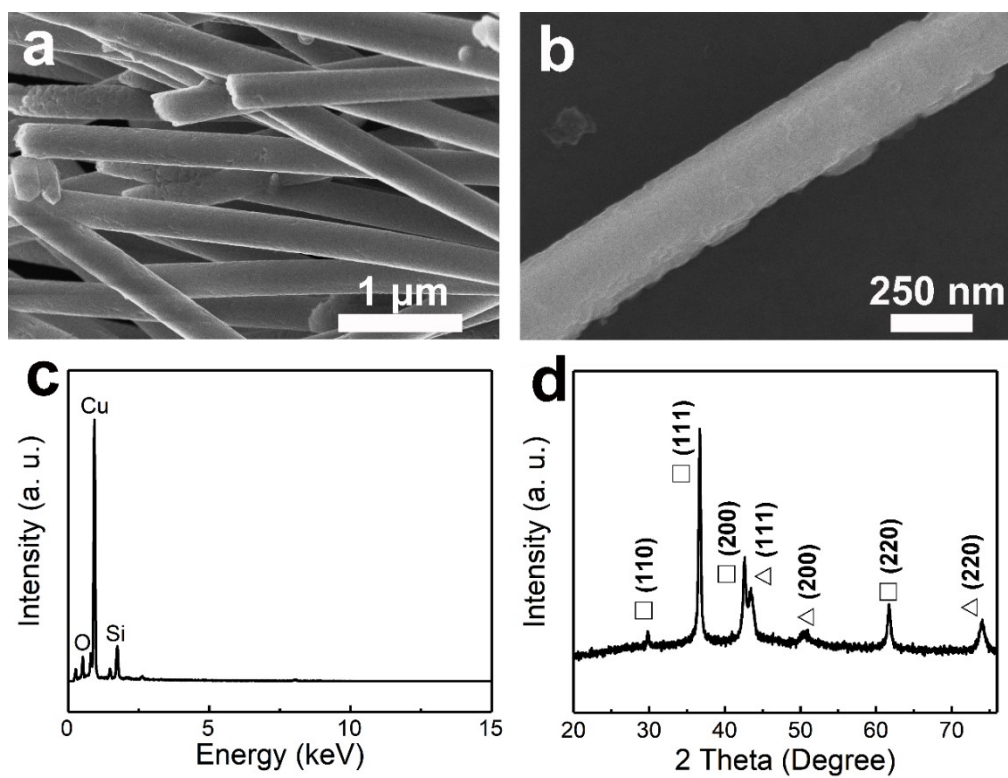

**Figure S6.** a) SEM, b) zoomed SEM, c) EDX d) XRD images of the Cu/Cu<sub>2</sub>O nanowires. Peaks denoted  $\Delta$  by  $\square$  belong to Cu and Cu<sub>2</sub>O phases, respectively.

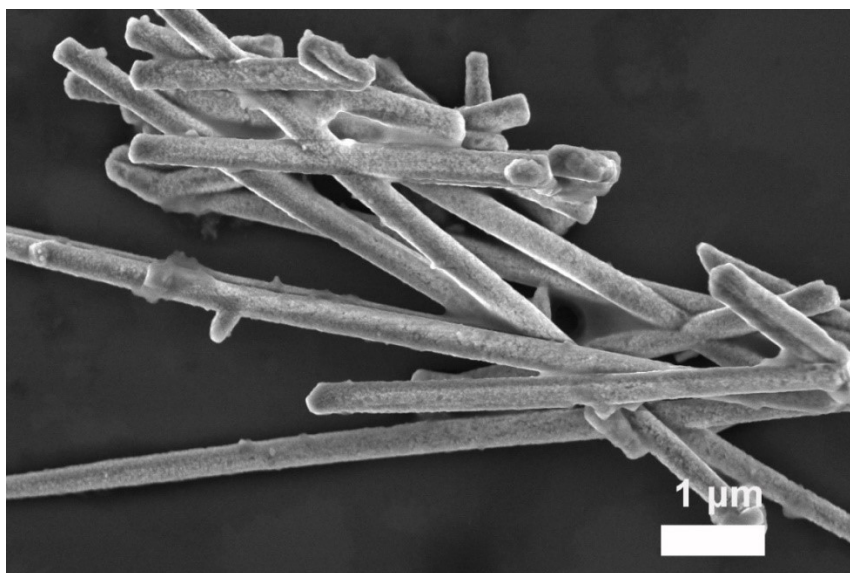

**Figure S7.** SEM image of the Cu/Cu<sub>2</sub>O PNs after the electroreduction test.

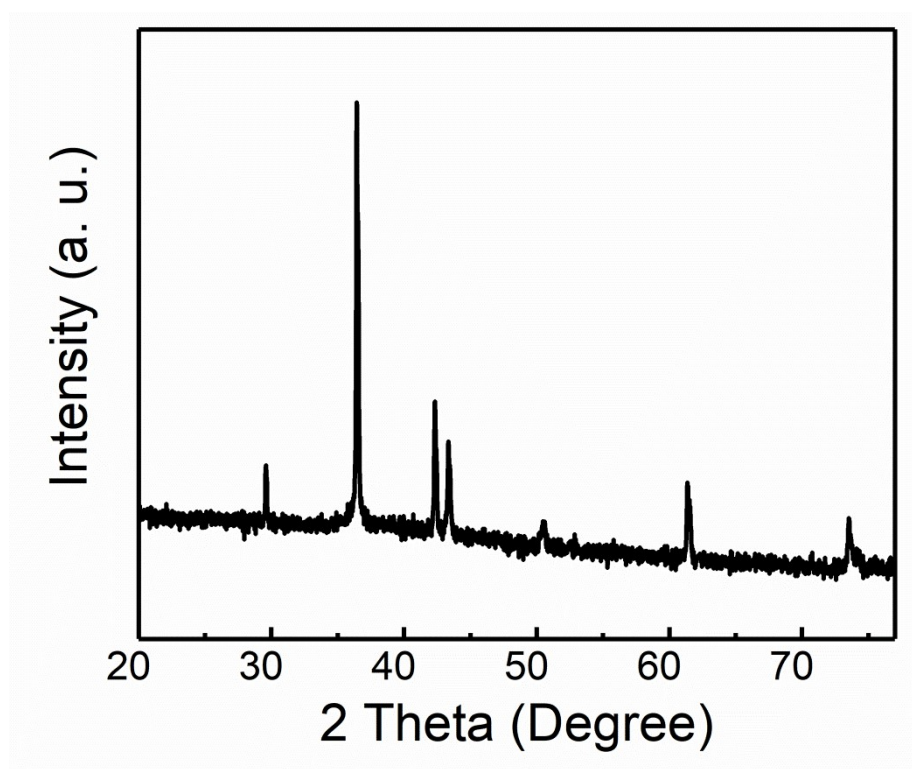

**Figure S8.** X-ray diffraction pattern of Cu/Cu<sub>2</sub>O PNs after the electroreduction test.

**Table S1.** Comparison of NH<sub>3</sub> yield and ammonia selectivity by electrocatalytic nitrate reduction

| <b>Electrocatalyst</b>                            | <b>Electrolyte</b>                                                                        | <b>NH<sub>3</sub> yield</b>                            | <b>Ammonia selectivity</b> | <b>Ref</b> |
|---------------------------------------------------|-------------------------------------------------------------------------------------------|--------------------------------------------------------|----------------------------|------------|
| <b>Cu/Cu<sub>2</sub>O porous nanowires</b>        | 50 ppm NO <sub>3</sub> <sup>-</sup> + 0.1 M K <sub>2</sub> SO <sub>4</sub>                | 2.73 mmol h <sup>-1</sup> g <sup>-1</sup>              | 37%                        | This work  |
| <b>CuO nanowire arrays</b>                        | 200 ppm NO <sub>3</sub> <sup>-</sup> -N + 0.5 M Na <sub>2</sub> SO <sub>4</sub>           | 0.2449 mmol h <sup>-1</sup> cm <sup>-2</sup>           | 81.2%                      | 1          |
| <b>Co<sub>2</sub>O<sub>3</sub> nanorod arrays</b> | 100 g L <sup>-1</sup> 0.1 M NO <sub>3</sub> <sup>-</sup> + K <sub>2</sub> SO <sub>4</sub> | 0.854 mmol h <sup>-1</sup> cm <sup>-2</sup>            | 33.6%                      | 2          |
| <b>Fe single atom catalyst</b>                    | 0.5 M NO <sub>3</sub> <sup>-</sup> + 0.1 M K <sub>2</sub> SO <sub>4</sub>                 | 0.46 mmol h <sup>-1</sup> cm <sup>-2</sup>             | 75%                        | 3          |
| <b>Cu-molecular solid catalyst</b>                | 50 ppm NO <sub>3</sub> <sup>-</sup> + 0.1 M PBS                                           | 436 ± 85 μg h <sup>-1</sup> cm <sup>-2</sup>           | N.A.<br>FE=85.9%           | 4          |
| <b>Co<sub>3</sub>O<sub>4</sub>@NiO</b>            | 200 ppm NO <sub>3</sub> <sup>-</sup> -N + 0.5 M Na <sub>2</sub> SO <sub>4</sub>           | 6.93 mmol h <sup>-1</sup> g <sup>-1</sup>              | 62.29%                     | 5          |
| <b>Ir nanotube</b>                                | 0.1 M NO <sub>3</sub> <sup>-</sup>                                                        | 921 μg h <sup>-1</sup> mg <sub>cat</sub> <sup>-1</sup> | N.A.<br>FE=84.7%           | 6          |
| <b>Ni<sub>2</sub>P</b>                            | 80mg L <sup>-1</sup> NO <sub>3</sub> <sup>-</sup>                                         | 0.056 mmol h <sup>-1</sup>                             | 89.1%                      | 7          |

|                                                     |                                    |                  |                                |          |   |
|-----------------------------------------------------|------------------------------------|------------------|--------------------------------|----------|---|
|                                                     | -N + 0.5 M                         | mg <sup>-1</sup> |                                |          |   |
|                                                     | Na <sub>2</sub> SO <sub>4</sub>    |                  |                                |          |   |
| <b>Ru/oxygen-doped-Ru core/shell nanoclusters t</b> | mixed                              | 5.56 mol         | g <sub>cat</sub> <sup>-1</sup> | ~100%    | 8 |
|                                                     | KOH/KNO <sub>3</sub>               | h <sup>-1</sup>  |                                |          |   |
|                                                     | solution                           |                  |                                |          |   |
| <b>Cu nanosheet</b>                                 | 10 mM NO <sub>3</sub> <sup>-</sup> | 390.1 μg         | mg <sup>-1</sup> <sub>Cu</sub> | N. A.    | 9 |
|                                                     | +0.1 M KOH                         | h <sup>-1</sup>  |                                | FE=99.7% |   |

- 1 Y. Wang, W. Zhou, R. Jia, Y. Yu, B. Zhang, *Angew. Chem. Int. Ed.* 2020, **59**, 5350.
- 2 Y. Wang, Y. Yu, R. Jia, C. Zhang and B. Zhang, *Natl. Sci. Rev.* 2019, **6**, 730.
- 3 Z. Y. Wu, M. Karamad, X. Yong, Q. Huang, D. A. Cullen, P. Zhu, C. Xia, Q. Xiao, M. Shakouri, F. Y. Chen, J. Y. Kim, Y. Xia, K. Heck, Y. Hu, M. S. Wong, Q. Li, I. Gates, S. Siahrostami, H. Wang, *Nat. Commun.* 2021, **12**, 2870.
- 4 G. F. Chen, Y. Yuan, H. Jiang, S. Y. Ren, L. X. Ding, L. Ma, T. Wu, J. Lu, H. Wang, *Nat. Energy*, 2020, **5**, 605.
- 5 Y. Wang, C. Liu, B. Zhang, Y. Yu, *Sci. China Mater.* 2020, **63**, 2530.
- 6 J. Y. Zhu, Q. Xue, Y. Y. Xue, Y. Ding, F. M. Li, P. Jin, P. Chen, Y. Chen, *ACS Appl. Mater. Interfaces* 2020, **12**, 14064.
- 7 Q. Yao, J. Chen, S. Xiao, Y. Zhang, X. Zhou, *ACS Appl. Mater. Interfaces* 2021, **13**, 30458.
- 8 J. Li, G. Zhan, J. Yang, F. Quan, C. Mao, Y. Liu, B. Wang, F. Lei, L. Li, A. W. M. Chan, L. Xu, Y. Shi, Y. Du, W. Hao, P. K. Wong, J. Wang, S. X. Dou, L. Zhang, J. C. Yu, *J. Am. Chem. Soc.* 2020, **142**, 7036.
- 9 X. Fu, X. Zhao, X. Hu, K. He, Y. Yu, T. Li, Q. Tu, X. Qian, Q. Yue, M.R. Wasielewski, Y. Kang, *Appl. Mater. Today*, 2020, **19**, 100620
